# Supplementary material for: Gender Composition in Occupational Therapy Journals’ Editorial Boards
Source: MDPI journal article supplement (doi:10.3390/ijerph20043458), 2023-02-16
Supplement: s1 [file s1]

Table S1. Journals information

| Rank | Title                                                            | EBM Total | Men | %     | Women | %     | Editorial Leader (EI) | Men (EI) | Women (EI) | Associate Editor (AE) | Men (AE) | Women (AE) | Editorial Board Member (EBM) | Man (EBM) | Women (EBM) | Type    |            | SJR   | SJR Quartile | H index | Country        | Publisher                                      | Coverage                   | Categories                                                                                                            |
|------|------------------------------------------------------------------|-----------|-----|-------|-------|-------|-----------------------|----------|------------|-----------------------|----------|------------|------------------------------|-----------|-------------|---------|------------|-------|--------------|---------|----------------|------------------------------------------------|----------------------------|-----------------------------------------------------------------------------------------------------------------------|
| 2    | American Journal of Occupational Therapy                         | 19        | 6   | 31.5o | 13    | 68.42 | 1                     | 0        | 1          | 15                    | 5        | 10         | 3                            | 1         | 2           | journal | 2246       | 0.657 | Q1           | 87      | United States  | American Occupational Therapy Association, Inc | 1947-2021                  | Medicine (miscellaneous); Occupational Therapy                                                                        |
| 4    | Australian Occupational Therapy Journal                          | 10        | 2   | 20    | 8     | 80    | 1                     | 0        | 1          | 4                     | 1        | 3          | 5                            | 1         | 4           | journal | 1856       | 0.519 | Q1           | 47      | United Kingdom | Wiley-Blackwell Publishing Ltd                 | 1952-1953, 1956-2021       | Occupational Therapy                                                                                                  |
| 11   | Brazilian Journal of Occupational Therapy                        | 55        | 11  | 20    | 44    | 80    | 1                     | 0        | 1          | 1                     | 0        | 1          | 53                           | 11        | 42          | journal | 0.13 (JCI) | 0.318 | Q3           | 7       | Brazil         | Universidade Federal de Sao Carlos             | 2018-2021                  | Education; Health (social science); Occupational Therapy                                                              |
| 8    | British Journal of Occupational Therapy                          | 14        | 5   | 35.71 | 9     | 64.2  | 1                     | 1        | 0          | 5                     | 1        | 4          | 8                            | 3         | 5           | journal | 1243       | 0.372 | Q2           | 49      | United Kingdom | SAGE Publications Inc.                         | 1974-1976, 1996-2021       | Occupational Therapy                                                                                                  |
| 6    | Canadian Journal of Occupational Therapy                         | 9         | 2   | 22.22 | 7     | 77.78 | 2                     | 0        | 2          | 7                     | 2        | 5          | 0                            | 0         | 0           | journal | 1614       | 0.405 | Q2           | 58      | United States  | SAGE Publications Inc.                         | 1933-2021                  | Occupational Therapy                                                                                                  |
| 14   | Hong Kong Journal of Occupational Therapy                        | 50        | 29  | 58    | 21    | 42    | 1                     | 1        | 0          | 4                     | 3        | 1          | 45                           | 25        | 20          | journal | 0.917      | 0.21  | Q3           | 15      | Singapore      | Elsevier (Singapore) Pte Ltd                   | 2002-2021                  | Occupational Therapy                                                                                                  |
| 15   | Irish Journal of Occupational Therapy                            | 16        | 4   | 25    | 12    | 75    | 1                     | 0        | 1          | 5                     | 0        | 5          | 10                           | 4         | 6           | journal | Not found  | 0.17  | Q4           | 4       | United Kingdom | Emerald Group Publishing Ltd.                  | 2018-2021                  | Occupational Therapy; Public Health, Environmental and Occupational Health                                            |
| 2    | Journal of Occupational Rehabilitation                           | 43        | 24  | 55.81 | 19    | 44.19 | 1                     | 1        | 0          | 2                     | 0        | 2          | 40                           | 23        | 17          | journal | 3489       | 1.049 | Q1           | 76      | United States  | Springer New York                              | 1991-2021                  | Occupational Therapy; Rehabilitation                                                                                  |
| 12   | Journal of Occupational Therapy, Schools, and Early Intervention | 37        | 3   | 8.11  | 34    | 91.89 | 1                     | 0        | 1          | 0                     | 0        | 0          | 36                           | 3         | 33          | journal | 0.22 (JCI) | 0.262 | Q3           | 12      | United Kingdom | Routledge                                      | 2008-2021                  | Education; Occupational Therapy; Social Psychology                                                                    |
| 5    | Journal of Vocational Rehabilitation                             | 118       | 62  | 52.54 | 56    | 47.46 | 1                     | 1        | 0          | 0                     | 0        | 0          | 117                          | 61        | 56          | journal | 0.41(JCI)  | 0.409 | Q1           | 40      | Netherlands    | IOS Press BV                                   | 1991-2021                  | Occupational Therapy; Rehabilitation                                                                                  |
| 10   | Occupational Therapy in Health Care                              | 33        | 8   | 24.24 | 25    | 75.76 | 1                     | 0        | 1          | 3                     | 1        | 2          | 29                           | 7         | 22          | journal | 0.53 (JCI) | 0.33  | Q2           | 26      | United States  | Informa Healthcare                             | 1984-1993, 1995-2021       | Medicine (miscellaneous); Occupational Therapy                                                                        |
| 16   | Occupational Therapy in Mental Health                            | 66        | 8   | 12.12 | 58    | 87.88 | 2                     | 0        | 2          | 1                     | 0        | 1          | 63                           | 8         | 55          | journal | 0.32 (JCI) | 0.289 | Q3           | 20      | United States  | Routledge                                      | 1980, 1982-1993, 1995-2021 | Applied Psychology (Q3); Psychiatry and Mental Health (Q3); Public Health, Environmental and Occupational Health (Q3) |
| 9    | Occupational Therapy International                               | 17        | 5   | 29.41 | 12    | 70.59 | 1                     | 0        | 1          | 2                     | 0        | 2          | 14                           | 5         | 9           | journal | 1448       | 0.354 | Q2           | 39      | Egypt          | Hindawi Limited                                | 1994-2021                  | Medicine (miscellaneous); Occupational Therapy                                                                        |

|    |                                                          |     |    |       |    |       |   |   |   |    |   |    |     |    |    |         |               |       |    |    |                   |                              |                                 |                                                                                              |
|----|----------------------------------------------------------|-----|----|-------|----|-------|---|---|---|----|---|----|-----|----|----|---------|---------------|-------|----|----|-------------------|------------------------------|---------------------------------|----------------------------------------------------------------------------------------------|
| 7  | OTJR<br>Occupation,<br>Participation<br>and Health       | 18  | 5  | 27.78 | 13 | 72.22 | 1 | 1 | 0 | 16 | 4 | 12 | 1   | 0  | 1  | journal | 0.378         | 0.402 | Q2 | 42 | United<br>States  | SAGE<br>Publications<br>Inc. | 2002-<br>2021                   | Occupational<br>Therapy                                                                      |
| 13 | Physical and<br>Occupational<br>Therapy in<br>Pediatrics | 110 | 14 | 12.73 | 96 | 87.27 | 2 | 1 | 1 | 3  | 0 | 3  | 105 | 13 | 92 | journal | 0.26<br>(JCI) | 0.254 | Q3 | 21 | United<br>States  | Informa<br>Healthcare        | 1980-<br>2021                   | Geriatrics and<br>Gerontology;<br>Gerontology;<br>Occupational<br>Therapy;<br>Rehabilitation |
| 13 | Physical and<br>Occupational<br>Therapy in<br>Geriatrics | 26  | 15 | 57.69 | 11 | 42.31 | 1 | 1 | 0 | 2  | 1 | 1  | 23  | 13 | 10 | journal | 0.26<br>(JCI) | 0.254 | Q3 | 21 | United<br>States  | Informa<br>Healthcare        | 1980-<br>2021                   | Geriatrics and<br>Gerontology;<br>Gerontology;<br>Occupational<br>Therapy;<br>Rehabilitation |
| 17 | Scandinavian<br>Journal of<br>Occupational<br>Therapy    | 26  | 4  | 15.3  | 22 | 84.62 | 1 | 0 | 1 | 0  | 0 | 0  | 25  | 4  | 21 | journal | 2611          | 0.579 | Q2 | 44 | United<br>Kingdom | Taylor and<br>Francis Ltd.   | 1994-<br>1996,<br>1999-<br>2021 | Public Health,<br>Environmental<br>and Occupational<br>Health (Q2)                           |

Table S2. Journals indexes

| Rank | Title                                                            | JCR        | SJR   | SJR Quartile | h-index | EB Total |        |
|------|------------------------------------------------------------------|------------|-------|--------------|---------|----------|--------|
| 2    | American Journal of Occupational Therapy                         | 2.246      | 0.657 | Q1           | 87      | 19       | 2.85%  |
| 4    | Australian Occupational Therapy Journal                          | 1,856      | 0.519 | Q1           | 47      | 10       | 1.50%  |
| 11   | Brazilian Journal of Occupational Therapy                        | 0.13 (JCI) | 0.318 | Q3           | 7       | 55       | 8.25%  |
| 8    | British Journal of Occupational Therapy                          | 1.243      | 0.372 | Q2           | 49      | 14       | 2.10%  |
| 6    | Canadian Journal of Occupational Therapy                         | 1.614      | 0.405 | Q2           | 58      | 9        | 1.35%  |
| 14   | Hong Kong Journal of Occupational Therapy                        | 0.917      | 0.21  | Q3           | 15      | 50       | 7.50%  |
| 15   | Irish Journal of Occupational Therapy                            | Not found  | 0.17  | Q4           | 4       | 16       | 2.40%  |
| 1    | Journal of Occupational Rehabilitation                           | 3.489      | 1.049 | Q1           | 76      | 43       | 6.45%  |
| 12   | Journal of Occupational Therapy, Schools, and Early Intervention | 0.22 (JCI) | 0.262 | Q3           | 12      | 37       | 5.55%  |
| 5    | Journal of Vocational Rehabilitation                             | 0.41(JCI)  | 0.409 | Q1           | 40      | 118      | 17.69% |
| 10   | Occupational Therapy in Health Care                              | 0.53 (JCI) | 0.33  | Q2           | 26      | 33       | 4.95%  |
| 16   | Occupational Therapy in Mental Health                            | 0.32 (JCI) |       |              |         | 66       | 9.90%  |
| 9    | Occupational Therapy International                               | 1,448      | 0.354 | Q2           | 39      | 17       | 2.55%  |
| 7    | OTJR Occupation, Participation and Health                        | 0.378      | 0.402 | Q2           | 42      | 18       | 2.70%  |
| 13   | Physical and Occupational Therapy in Geriatrics                  | 0.26 (JCI) | 0.254 | Q3           | 21      | 110      | 16.49% |
| 3    | Physical and Occupational Therapy in Pediatrics                  | 2,360      | 0.527 | Q1           | 48      | 26       | 3.90%  |
| 17   | Scandinavian Journal of Occupational Therapy                     | 2,611      |       |              |         | 26       | 3.90%  |
|      |                                                                  |            |       |              |         | 667      | 100%   |

Table S3. Men-Women Ratio.

| Title                                                            | Title  | EBMs total | n  | %      | n  | %      | M-W Ratio |
|------------------------------------------------------------------|--------|------------|----|--------|----|--------|-----------|
| Journal of Occupational Therapy, Schools, and Early Intervention | JOTSEI | 37         | 34 | 91.89% | 3  | 8.11%  | 11.33     |
| Occupational Therapy in Mental Health                            | OTMH   | 66         | 58 | 87.88% | 8  | 12.12% | 7.25      |
| Physical and Occupational Therapy in Geriatrics                  | POTG   | 110        | 96 | 87.27% | 14 | 12.73% | 6.86      |
| Scandinavian Journal of Occupational Therapy                     | SJOT   | 26         | 22 | 84.62% | 4  | 15.38% | 5.50      |
| Australian Occupational Therapy Journal                          | AUSOTJ | 10         | 8  | 80.00% | 2  | 20.00% | 4.00      |
| Brazilian Journal of Occupational Therapy                        | CADBTO | 55         | 44 | 80.00% | 11 | 20.00% | 4.00      |
| Canadian Journal of Occupational Therapy                         | CJOT   | 9          | 7  | 77.78% | 2  | 22.22% | 3.50      |
| Occupational Therapy in Health Care                              | OTHC   | 33         | 25 | 75.76% | 8  | 24.24% | 3.13      |
| Irish Journal of Occupational Therapy                            | IJOT   | 16         | 12 | 75.00% | 4  | 25.00% | 3.00      |
| OTJR Occupation, Participation and Health                        | OTJR   | 18         | 13 | 72.22% | 5  | 27.78% | 2.60      |
| Occupational Therapy International                               | OTI    | 17         | 12 | 70.59% | 5  | 29.41% | 2.40      |
| American Journal of Occupational Therapy                         | AJOT   | 19         | 13 | 68.42% | 6  | 31.58% | 2.17      |
| British Journal of Occupational Therapy                          | BJOT   | 14         | 9  | 64.29% | 5  | 35.71% | 1.80      |
| Journal of Vocational Rehabilitation                             | JVR    | 118        | 56 | 47.46% | 62 | 52.54% | 0.90      |
| Journal of Occupational Rehabilitation                           | JOR    | 43         | 19 | 44.19% | 24 | 55.81% | 0.79      |
| Physical and Occupational Therapy in Pediatrics                  | POTP   | 26         | 11 | 42.31% | 15 | 57.69% | 0.73      |
| Hong Kong Journal of Occupational Therapy                        | HKJOT  | 50         | 21 | 42.00% | 29 | 58.00% | 0.72      |
